# Supplementary material for: Protoporphyrin IX Binds to Iron(II)-Loaded and to Zinc-Loaded Human Frataxin
Source: MDPI journal article supplement (doi:10.3390/life13010222), 2023-01-12
Supplement: s1 [file s1]

Supplementary Material for:

## **Protoporphyrin IX binds to iron(II)-loaded and to zinc-loaded human frataxin**

Ganeko Bernardo-Seisdedos<sup>1,2,#</sup>, Andreas Schedlbauer<sup>2,#</sup>, Tania Pereira-Ortuzar<sup>2</sup>, José M Mato<sup>2,3</sup> and Oscar Millet<sup>1,2,3,\*</sup>

<sup>1</sup>ATLAS Molecular Pharma, Bizkaia Science and Technology Park, 48160 Derio, Spain.

<sup>2</sup>Precision Medicine and Metabolism Laboratory, CIC bioGUNE, Basque Research and Technology Alliance (BRTA), Bizkaia Science and Technology Park, 48160 Derio, Spain.

<sup>3</sup>Biomedical Research Network on Hepatic and Digestive Diseases (CIBEREHD), Instituto de Salud Carlos III, Madrid, Spain.

# Both authors contributed equally.

\*To whom correspondence should be addressed: [omillet@cicbiogune.es](mailto:omillet@cicbiogune.es)

### Contents:

Figure S1. FECH enzyme activity assay.

Figure S2. FXN intensity ratios upon Fe<sup>2+</sup> binding.

Figure S3. Effect of cholate in Zn<sup>2+</sup> binding to FXN.

Figure S4. PPIX does not associate to apo-FXN.

Figure S5. EC<sub>50</sub> determination for PPIX association to Fe<sup>2+</sup>-loaded FXN.

Figure S6. Zn<sup>2+</sup>-loaded FXN intensity ratio as a function of FCH.

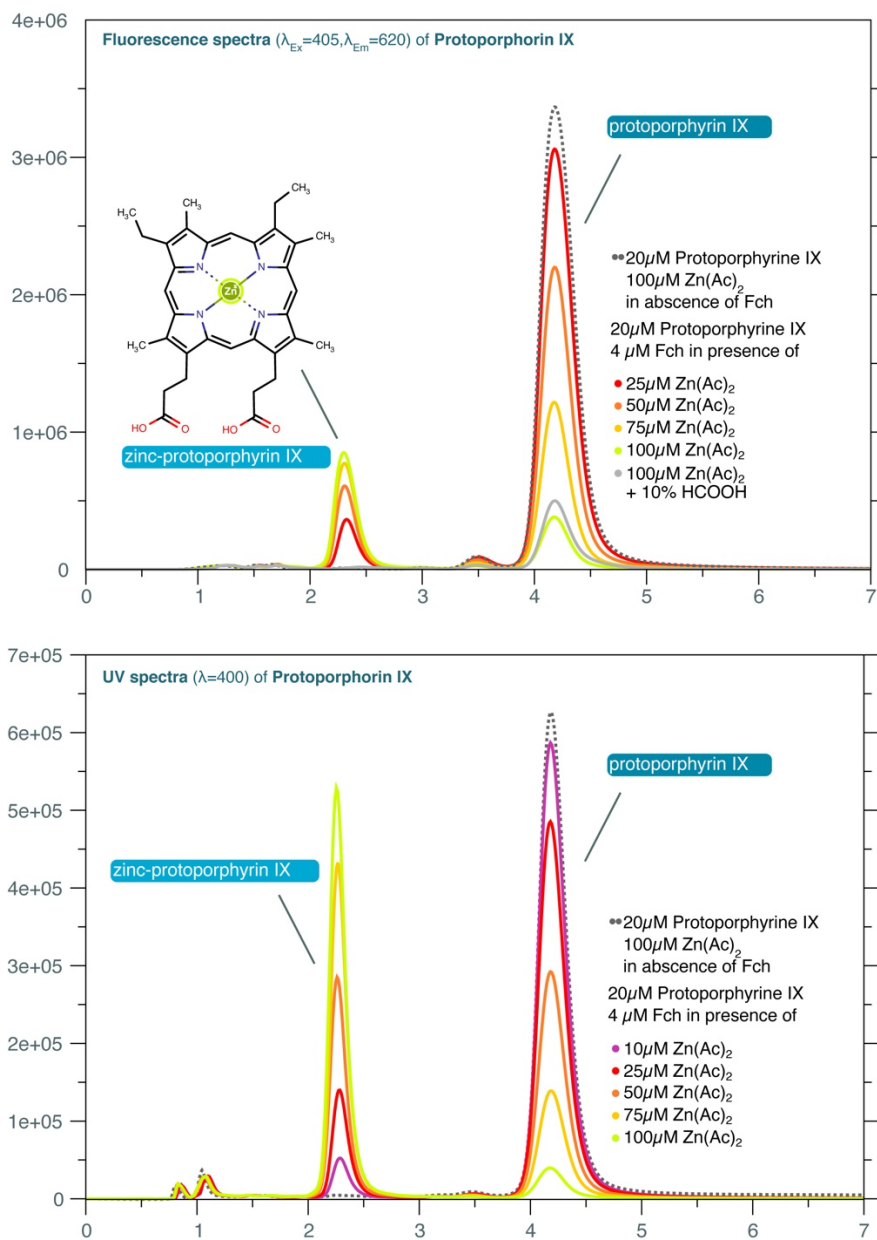

**Figure S1.** *FECH* enzyme activity assay. The chromatographic elucidation of Zn-PPIX and PPIX demonstrates FCH activity. In the absence of enzyme (dotted line) no Zn-PPIX is formed.

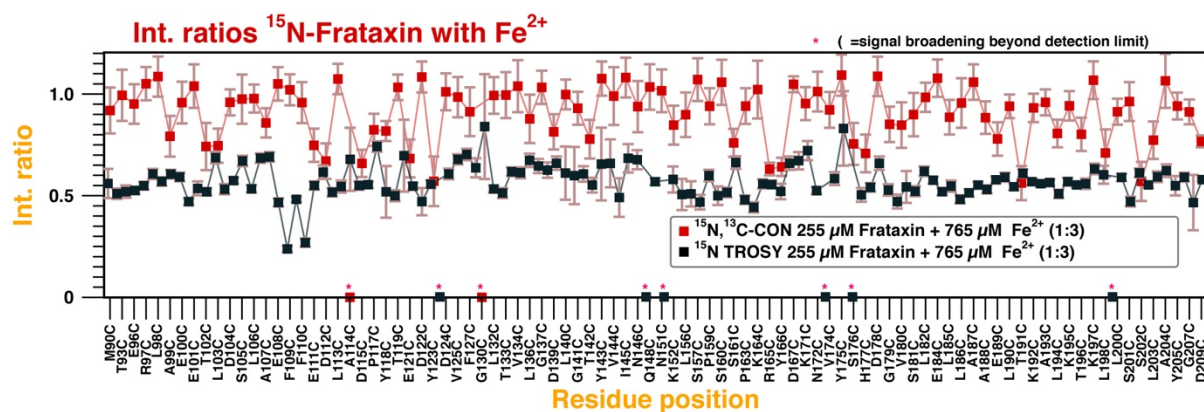

**Figure S2.** *FXN* intensity ratios upon  $\text{Fe}^{2+}$  binding. Residue dependent comparison of the intensity ratios for the  $^{15}\text{N}$ -TROSY (black squares) with the CON experiment (red squares).

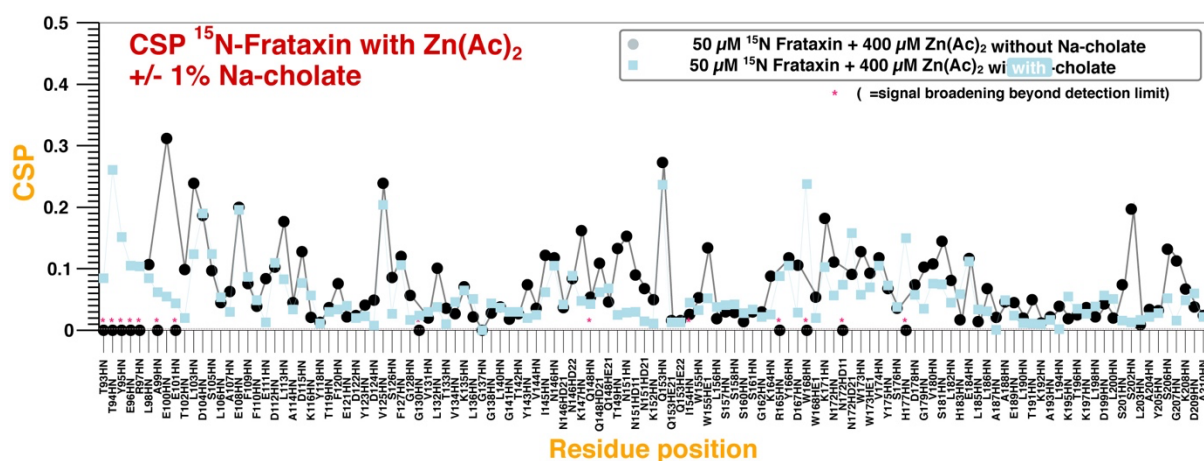

**Figure S3.** Effect of cholate in  $\text{Zn}^{2+}$  binding to *FXN*. Residue dependent comparison of the CSP induced by  $\text{Zn}^{2+}$  in the presence (blue squares) and in the absence (black circles) of 1% of sodium cholate.

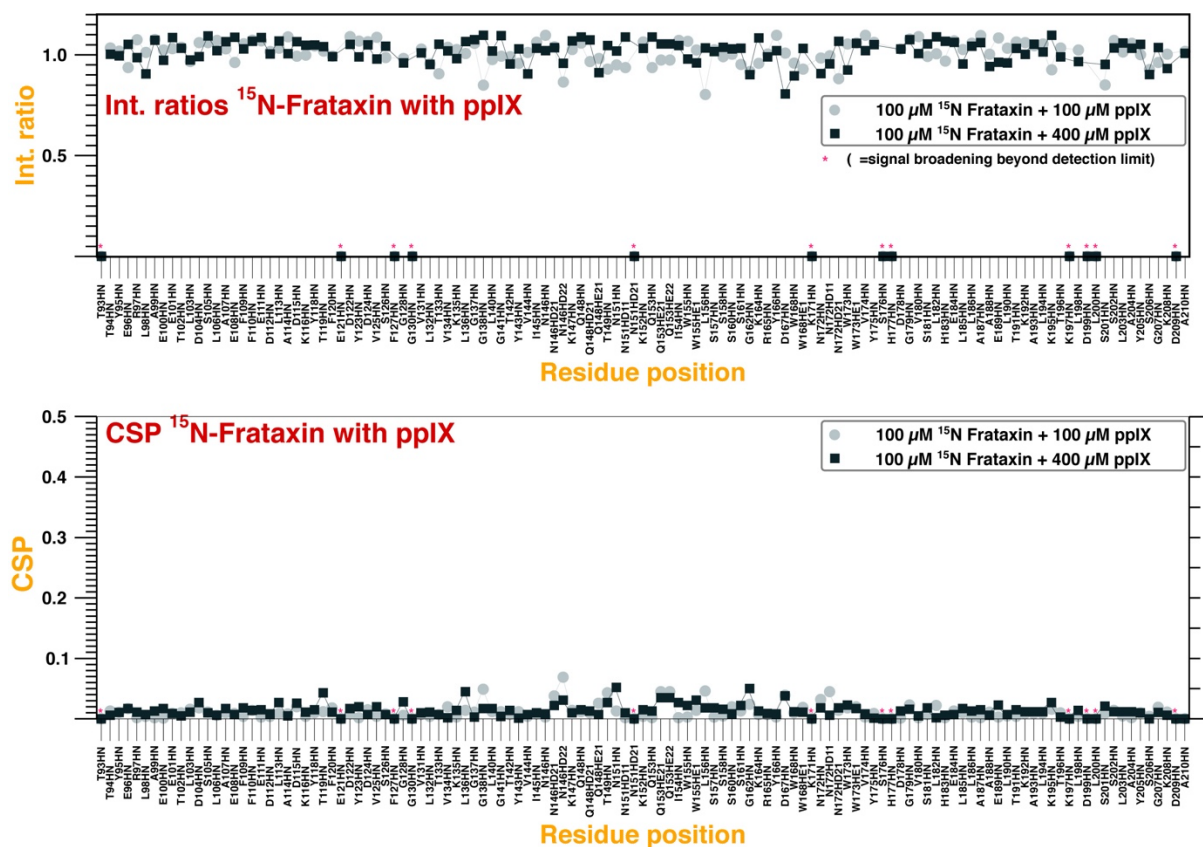

**Figure S4.** PPIX does not associate to apo-FXN. Changes in intensity (top) and CSPs (bottom) after the addition of 1 equivalent (gray circles) or 4 equivalents (black squares) of PPIX. Signals with a red asterisk showed a poor S/N (below 3) and they were not considered in the analysis.

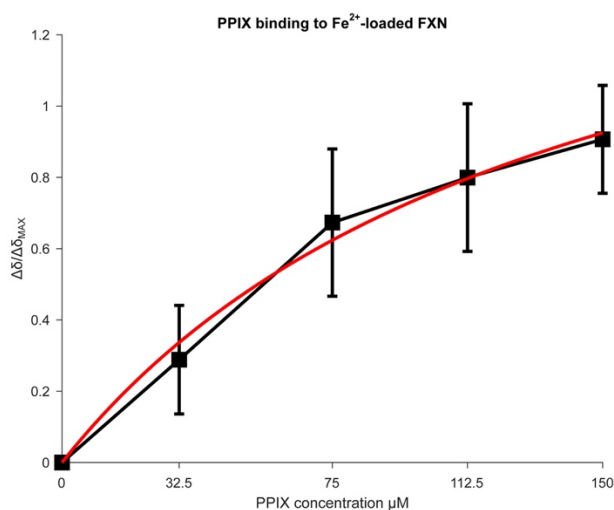

**Figure S5.**  $EC_{50}$  determination for PPIX association to Fe<sup>2+</sup>-loaded FXN. Experimental data (black) and best fitting to the PPIX titration to Fe<sup>2+</sup>-loaded (1 eq.) FXN (red curve).

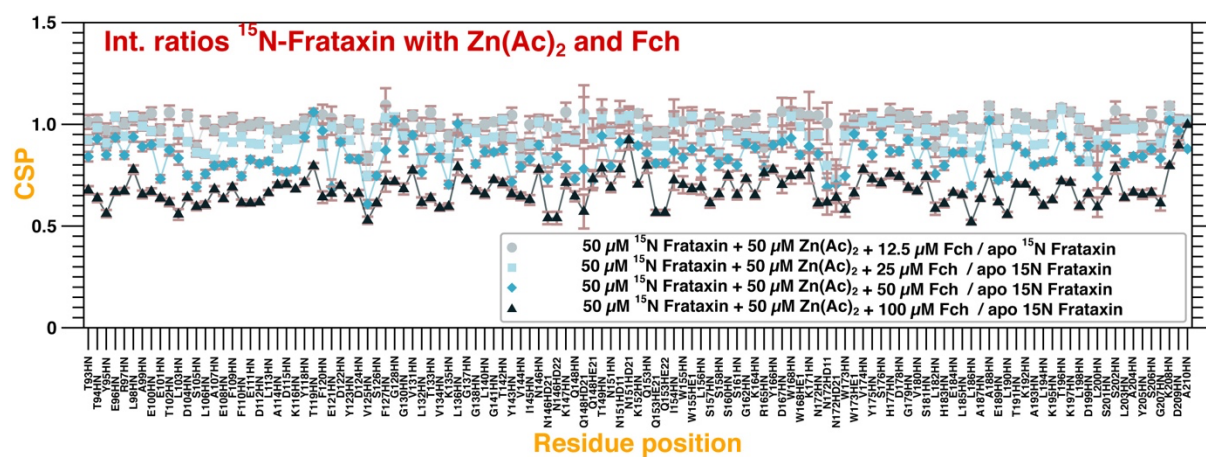

**Figure S6.**  $\text{Zn}^{2+}$ -loaded FXN intensity ratio as a function of FCH. The intensity ratios are coloured coded as indicated in the legend.
